# Supplementary material for: A Full Suite of Histone and Histone Modifying Genes Are Transcribed in the Dinoflagellate Lingulodinium
Source: PubMed Central journal article supplement (PMC3319573; doi:10.1371/journal.pone.0034340), 2012-04-04
Supplement: pone.0034340.s004.pdf [file pone.0034340.s004.pdf]

|            |                                                              |
|------------|--------------------------------------------------------------|
| H4_27324_L | mapstprqvrprpaaevqPaaelrpAarGarqpavArppPaalgpevratepeqllrglg |
| H4_25974_1 | -----MSsvPghsstKAsKGDKfSKEAEKQP-----                         |
| H4_25974_2 | -----MSsvPggsstKAsKGDKfSKEAEKQP-----                         |
| H4_Hom_sa  | -----msGrgKgGKG-----                                         |
| H4_Sac_ce  | -----msGrgKgGKG-----                                         |

|            |                                                               |
|------------|---------------------------------------------------------------|
| H4_27324_L | vlaclaegapaalgvpalpsrparlppsrelrpalvaavarrlprradiavaegqprL GK |
| H4_25974_1 | -----vGK                                                      |
| H4_25974_2 | -----vGK                                                      |
| H4_Hom_sa  | -----L GK                                                     |
| H4_Sac_ce  | -----L GK                                                     |

|            |                                                                |
|------------|----------------------------------------------------------------|
| H4_27324_L | GGgKRsqKViRehsaGITKsdlRRLARRaGcqRvamLIYdEARaaLaSFLEkmLaDitvY   |
| H4_25974_1 | GGAtRHRKVL RDNIQGITKPAIRRLARRGGVKRISGLIYEESRGVLKTFLENVLRDSITY  |
| H4_25974_2 | GGAtRHRKVL RDNIQGITKPAIRRLARRGGVKRISGLIYEESRGVLKTFLENVLRDSITY  |
| H4_Hom_sa  | GGAKRHRKVL RDNIQGITKPAIRRLARRGGVKRISGLIYEETRGVLKvFLENVIRD AVTY |
| H4_Sac_ce  | GGAKRHRKiLRDNIQGITKPAIRRLARRGGVKRISGLIYEEvRaVLKSFLEsVirDSVTY   |

|            |                                |
|------------|--------------------------------|
| H4_27324_L | TEHtKRKTacpqDVVlsLrRrGRvVYGa-- |
| H4_25974_1 | TEHArRKTVTALDiVYALKRQGRTIYGFGl |
| H4_25974_2 | TEHArRKTVTALDiVYALKRQGRTIYGFGl |
| H4_Hom_sa  | TEHAKRKTVTAMDVVYALKRQGRTlyGFGg |
| H4_Sac_ce  | TEHAKRKTVTsLDVVYALKRQGRTlyGFGg |
